# Supplementary material
Source: PubMed Central journal article supplement (PMC4827670)
Supplement: oc5b00400_si_001.pdf [file oc5b00400_si_001.pdf]

## *Supporting Information*

# **Carbon Nanotubes Produced from Ambient Carbon Dioxide for Environmentally Sustainable Lithium-Ion and Sodium-Ion Battery Anodes**

*Stuart Licht<sup>1,\*</sup>, Anna Douglas<sup>2</sup>, Jiawen Ren<sup>1</sup>, Rachel Carter<sup>2</sup>, Matthew Lefler<sup>1</sup>, and Cary L. Pint<sup>2,\*</sup>*

<sup>1</sup>Department of Chemistry, George Washington University, Washington, DC 20052, USA

<sup>2</sup>Department of Mechanical Engineering, Interdisciplinary Materials Science Program, and Vanderbilt Institute of Nanoscale Science and Engineering, Vanderbilt University, Nashville TN 37235

\*Corresponding Authors: [slicht@gwu.edu](mailto:slicht@gwu.edu), [cary.l.pint@vanderbilt.edu](mailto:cary.l.pint@vanderbilt.edu)

### ***Experimental Details***

#### **Sodium Ion and Lithium Ion Battery Device Fabrication and Electrochemical Testing**

CNTs produced using the STEP process, which is described in detail elsewhere, [1] were assembled into half-cell devices in an Ar glovebox using 2032 stainless steel coin cells (MTI). For the sodium ion batteries, the CNTs were combined in a slurry with conductive carbon black and PVDF binder at a ratio of 3:1:1, respectively. The slurry is assembled with a 2500 Celgard

separator saturated with 1 M NaPF<sub>6</sub> in diethylene glycol dimethyl ether (DGM) (Sigma-Aldrich) separating the cathode material from pure sodium foil (Sigma-Aldrich). The same procedure is followed for the lithium ion batteries, using lithium (Sigma-Aldrich) as the counter electrode and, for the electrolyte, 1 M LiPF<sub>6</sub> in 1 g/1 mL of ethylene carbonate (EC) and diethyl carbonate (DEC). Based on assessment of the electrodes pressed into coin cells, typical mass density loadings were observed to be  $\sim 0.06$  mg/cm<sup>2</sup>, and the density of the electrode with 60% CNT, 20% PVDF, and 20% carbon black was measured near  $\sim 0.54$  g/cm<sup>3</sup>. The devices were tested utilizing a Metrohm Autolab multichannel testing system. Cyclic voltammetry was performed at room temperature on the devices between 0 and 3.0 V at a constant scan rate of 0.1 mV/s, and galvanostatic charge–discharge measurements were carried out for constant currents ranging from 0.1 to 1 A/g, but in most cases reported in the text involving rates of 0.1 A/g. Cycling studies were performed at 0.1 A/g.

### **Material Analysis: SEM and Raman Spectroscopy**

To characterize materials used in batteries, both SEM and Raman spectroscopic analysis was performed. SEM was carried out using a Zeiss Merlin microscope using 5 kV accelerating voltage and working distance of  $\sim 4$  mm. Raman measurements were performed on a Renishaw inVia microscope using 532 nm laser excitations.

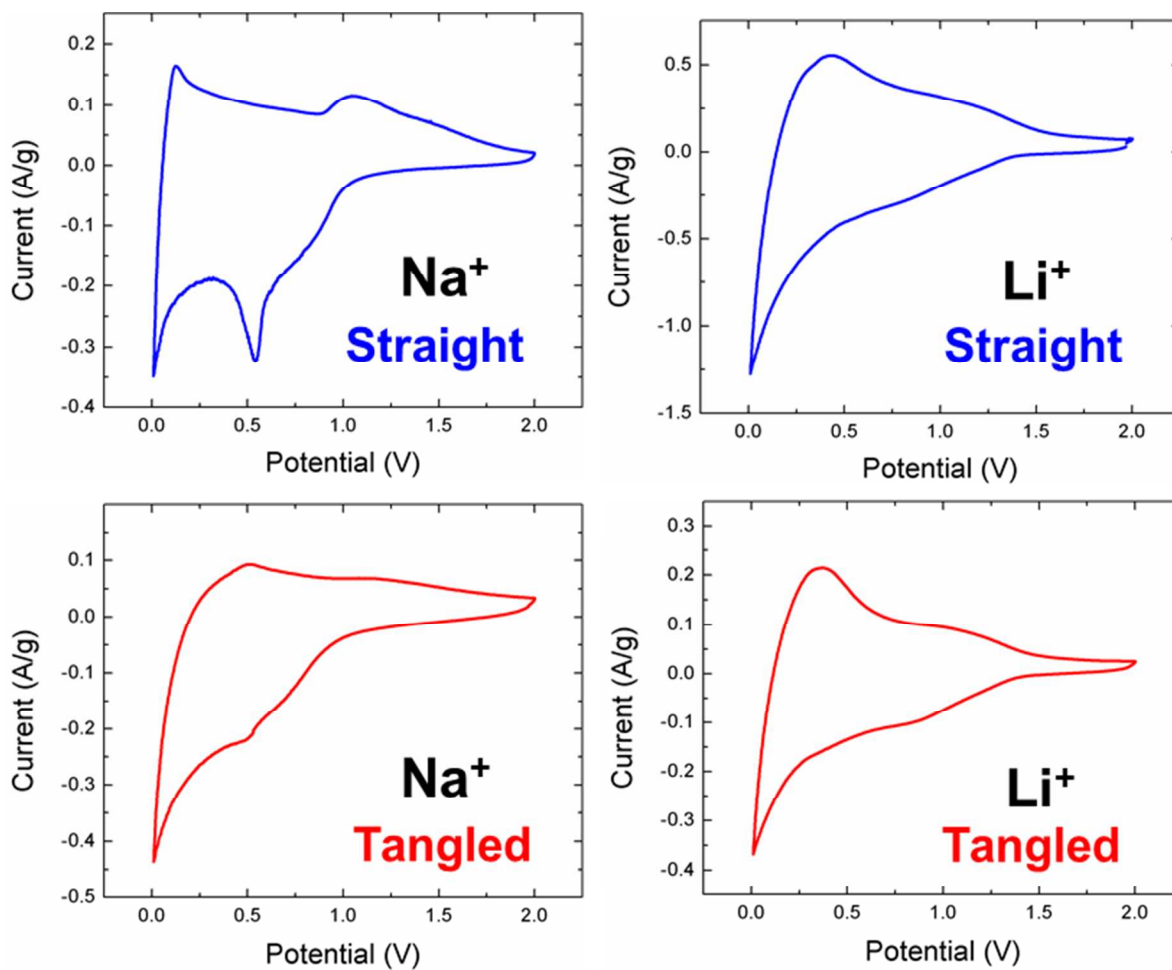

**Figure S1. Cyclic voltammetry measurements at 100 mV/second for straight and tangled CNTs as anodes in both Li<sup>+</sup> and Na<sup>+</sup> cells. The low voltage insertion and extraction in all devices emphasizes anodic performance**

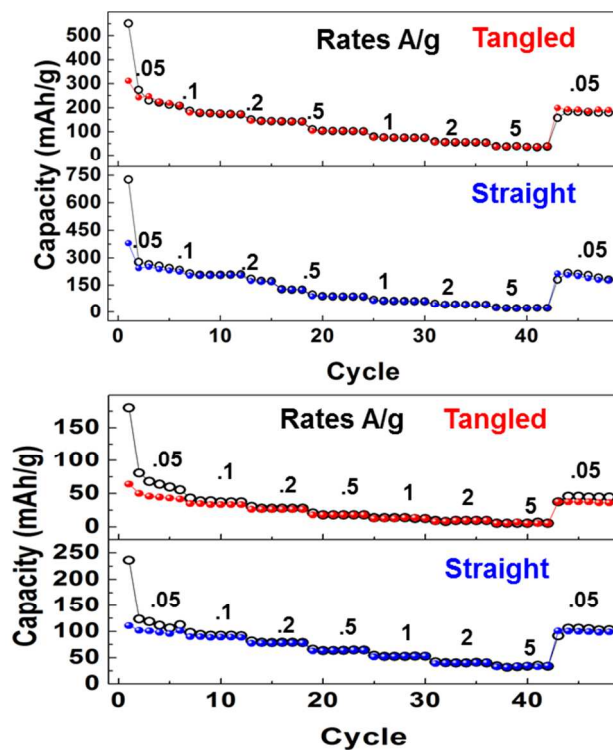

**Figure S2. Rate capability studies for Li<sup>+</sup> and Na<sup>+</sup> cells incorporating CO<sub>2</sub>-derived CNTs as anodes. Cycling rates (in A/g) are labeled on the plots.**

## References

- [1] Ren, J. W.; Li, F. F.; Lau, J.; Gonzalez-Urbina, L.; Licht, S. One-Pot Synthesis of Carbon Nanofibers from CO<sub>2</sub>. *Nano Lett.* **2015**, *15*, 6142-6148.
